# Supplementary material
Source: PubMed Central journal article supplement (PMC5794408)
Supplement: medi-97-e9757-s001.pdf [file medi-97-e9757-s001.pdf]

Supplemental Figure 1. Kaplan-Meier survival curves for patients receiving sorafenib prescribed by oncologists or GI/hepatologists after propensity matching. No significant differences were identified by Kaplan-Meier or Cox proportional hazard methodologies.

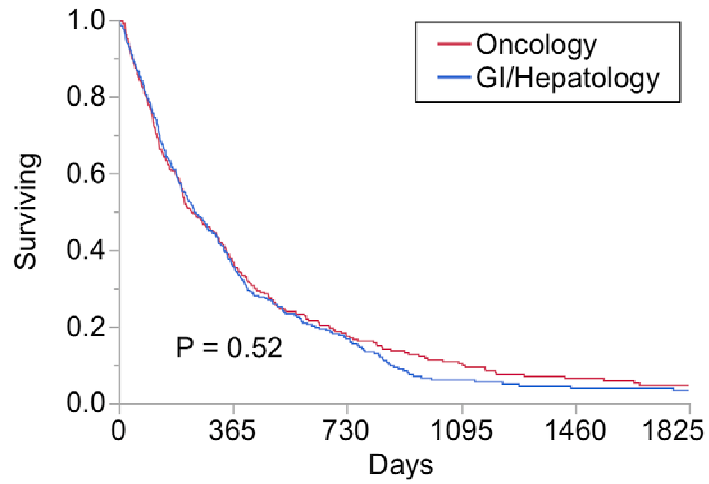

Supplementary Table 1. Baseline Characteristics of Propensity Matched Cohort

| Parameter                                                         | GI/Hepatology | Oncology     | p     |
|-------------------------------------------------------------------|---------------|--------------|-------|
| <b>General</b>                                                    |               |              |       |
| N                                                                 | 202           | 404          |       |
| Age (Mean ± SD)                                                   | 62.3 ± 7.2    | 62.9 ± 7.8   | 0.32  |
| Gender (% Female)                                                 | 2.0           | 1.0          | 0.31  |
| Alphafetoprotein (Mean ± SD)                                      | 8004 ± 36987  | 6140 ± 33373 | 0.51  |
| <b>Race/Ethnicity</b>                                             |               |              |       |
| White (%)                                                         | 57.6          | 57.6         | 0.97  |
| Black (%)                                                         | 33.1          | 32.4         |       |
| Asian (%)                                                         | 0.3           | 0.7          |       |
| Other (%)                                                         | 0.3           | 0.2          |       |
| Unknown (%)                                                       | 8.6           | 7.6          |       |
| <b>Barcelona Liver Cancer Clinic Stage</b>                        |               |              |       |
| A (%)                                                             | 10.6          | 10.6         | 1.0   |
| B (%)                                                             | 33.1          | 33.1         |       |
| C (%)                                                             | 51.0          | 51.0         |       |
| D (%)                                                             | 5.3           | 5.3          |       |
| <b>Comorbidity (Cirrhosis Comorbidity Index)</b>                  |               |              |       |
| 0                                                                 | 26.4          | 25.2         | 0.04  |
| 1+0                                                               | 35.1          | 28.1         |       |
| 1+1                                                               | 8.6           | 7.2          |       |
| 3+0                                                               | 5.9           | 7.3          |       |
| 3+1                                                               | 15.5          | 16.2         |       |
| 5+0                                                               | 4.9           | 7.9          |       |
| 5+1                                                               | 0.0           | 0.0          |       |
| <b>Model for End Stage Liver Disease (MELD) Score (mean ± sd)</b> |               |              |       |
|                                                                   | 15.5 ± 4.9    | 15.5 ± 4.9   | 1.0   |
| <b>Child-Turcotte-Pugh Score</b>                                  |               |              |       |
| 5                                                                 | 28.1          | 27.8         | 0.45  |
| 6                                                                 | 32.7          | 27.8         |       |
| 7                                                                 | 19.5          | 23.8         |       |
| 8                                                                 | 10.3          | 10.3         |       |
| 9                                                                 | 4.9           | 6.6          |       |
| 10                                                                | 2.6           | 0.6          |       |
| 11                                                                | 1.3           | 0.3          |       |
| 12                                                                | 0.0           | 0.3          |       |
| 13                                                                | 0.3           | 0.0          |       |
| <b>Prescribed full dose (%)</b>                                   |               |              |       |
|                                                                   | 66.2          | 65.2         | 0.79  |
| <b>Chemoembolization prior to sorafenib (%)</b>                   |               |              |       |
|                                                                   | 43            | 33.8         | 0.019 |
| <b>Chemoembolization following sorafenib (%)</b>                  |               |              |       |
|                                                                   | 15.2          | 7.6          | 0.003 |

| specialty    | 1          | 0          | specialty    | 1          | 0          |
|--------------|------------|------------|--------------|------------|------------|
| circom_0     |            | 80         | 76 age_mean  | 62.3708609 | 62.9701987 |
| circom_0_pc  | 0.26490066 | 0.25165563 | age_sd       | 7.22823542 | 7.85642167 |
| circom_1     |            | 106        | 85 meld_mean | 15.5033113 | 15.5033113 |
| circom_1_pc  | 0.35099338 | 0.28145695 | meld_sd      | 4.89066393 | 4.89066393 |
| circom_2     |            | 26         | 22 ctp_mean  | 6.46357616 | 6.54304636 |
| circom_2_pc  | 0.08609272 | 0.07284768 | ctp_sd       | 1.42951719 | 1.45695764 |
| circom_3     |            | 18         | 22 afp_mean  | 8004.49735 | 6140.04636 |
| circom_3_pc  | 0.05960265 | 0.07284768 | afp_sd       | 36987.4988 | 33373.4508 |
| circom_4     |            | 47         | 49 race_w    | 174        | 174        |
| circom_4_pc  | 0.15562914 | 0.16225166 | race_w_pct   | 0.57615894 | 0.57615894 |
| circom_5     |            | 10         | 24 race_b    | 100        | 98         |
| circom_5_pc  | 0.03311258 | 0.0794702  | race_b_pct   | 0.33112583 | 0.32450331 |
| circom_6     |            | 15         | 24 race_a    | 1          | 2          |
| circom_6_pc  | 0.04966887 | 0.0794702  | race_a_pct   | 0.00331126 | 0.00662252 |
| tace_1_pct   | 0.43046358 | 0.33774834 | race_o       | 1          | 5          |
| tace_2_pct   | 0.15231788 | 0.07615894 | race_o_pct   | 0.00331126 | 0.01655629 |
| male_pct     | 0.98013245 | 0.99006623 | race_u       | 26         | 23         |
| full_dose_pc | 0.66225166 | 0.65231788 | race_u_pct   | 0.08609272 | 0.07615894 |
|              |            |            | bclc_a       | 32         | 32         |
|              |            |            | bclc_a_pct   | 0.10596026 | 0.10596026 |
|              |            |            | bclc_b       | 100        | 100        |
|              |            |            | bclc_b_pct   | 0.33112583 | 0.33112583 |
|              |            |            | bclc_c       | 154        | 154        |
|              |            |            | bclc_c_pct   | 0.50993377 | 0.50993377 |
|              |            |            | bclc_d       | 16         | 16         |
|              |            |            | bclc_d_pct   | 0.05298013 | 0.05298013 |
|              |            |            | ctp_5        | 85         | 84         |
|              |            |            | ctp_5_pct    | 0.28145695 | 0.2781457  |
|              |            |            | ctp_6        | 99         | 84         |
|              |            |            | ctp_6_pct    | 0.32781457 | 0.2781457  |
|              |            |            | ctp_7        | 59         | 72         |
|              |            |            | ctp_7_pct    | 0.19536424 | 0.2384106  |
|              |            |            | ctp_8        | 31         | 31         |
|              |            |            | ctp_8_pct    | 0.10264901 | 0.10264901 |
|              |            |            | ctp_9        | 15         | 20         |
|              |            |            | ctp_9_pct    | 0.04966887 | 0.06622517 |
|              |            |            | ctp_10       | 8          | 2          |
|              |            |            | ctp_10_pct   | 0.02649007 | 0.00662252 |
|              |            |            | ctp_11       | 4          | 8          |
|              |            |            | ctp_11_pct   | 0.01324503 | 0.02649007 |
|              |            |            | ctp_12       | 0          | 1          |
|              |            |            | ctp_12_pct   | 0          | 0.00331126 |
|              |            |            | ctp_13       | 1          | 0          |
|              |            |            | ctp_13_pct   | 0.00331126 | 0          |

Supplementary Table 1. Baseline Characteristics of Propensity Matched Cohort

| Parameter                                 | GI/Hepatology    | Oncology         | p     |
|-------------------------------------------|------------------|------------------|-------|
| General                                   |                  |                  |       |
| N                                         | 202              | 404              |       |
| Age (Mean $\pm$ SD)                       | 62.3 $\pm$ 7.2   | 62.9 $\pm$ 7.8   | 0.32  |
| Gender (% Female)                         | 2.0              | 1.0              | 0.31  |
| AFP (Mean $\pm$ SD)                       | 8004 $\pm$ 36987 | 6140 $\pm$ 33373 | 0.51  |
| Race/Ethnicity                            |                  |                  | 0.97  |
| White (%)                                 | 57.6             | 57.6             |       |
| Black (%)                                 | 33.1             | 32.4             |       |
| Asian (%)                                 | 0.3              | 0.7              |       |
| Other (%)                                 | 0.3              | 0.2              |       |
| Unknown (%)                               | 8.6              | 7.6              |       |
| BCLC Stage                                |                  |                  | 1.0   |
| A (%)                                     | 10.6             | 10.6             |       |
| B (%)                                     | 33.1             | 33.1             |       |
| C (%)                                     | 51.0             | 51.0             |       |
| D (%)                                     | 5.3              | 5.3              |       |
| Comorbidity (Cirrhosis Comorbidity Index) |                  |                  | 0.04  |
| 0                                         | 26.4             | 25.2             |       |
| 1+0                                       | 35.1             | 28.1             |       |
| 1+1                                       | 8.6              | 7.2              |       |
| 3+0                                       | 5.9              | 7.3              |       |
| 3+1                                       | 15.5             | 16.2             |       |
| 5+0                                       | 4.9              | 7.9              |       |
| 5+1                                       | 0.0              | 0.0              |       |
| MELD Score (mean $\pm$ stdev)             | 15.5 $\pm$ 4.9   | 15.5 $\pm$ 4.9   | 1.0   |
| Child-Turcotte-Pugh Score                 |                  |                  | 0.45  |
| 5                                         | 28.1             | 27.8             |       |
| 6                                         | 32.7             | 27.8             |       |
| 7                                         | 19.5             | 23.8             |       |
| 8                                         | 10.3             | 10.3             |       |
| 9                                         | 4.9              | 6.6              |       |
| 10                                        | 2.6              | 0.6              |       |
| 11                                        | 1.3              | 0.3              |       |
| 12                                        | 0.0              | 0.3              |       |
| 13                                        | 0.3              | 0.0              |       |
| Prescribed full dose (%)                  | 66.2             | 65.2             | 0.79  |
| TACE prior to sorafenib (%)               | 43               | 33.8             | 0.019 |
| TACE following sorafenib (%)              | 15.2             | 7.6              | 0.003 |
